# Supplementary material for: Phytochemical analysis and biological activities of Scabiosa atropurpurea L. aerial parts growing on Northern Algeria
Source: Research Square preprint supplement (doi:10.21203/rs.3.rs-7381800/v1), 2025-09-24
Supplement: Supplementary file 1 [file 0adbb8b275e9a8f0dd02d428.docx]

**Supplementary file**

**Phytochemical analysis and biological activities of *Scabiosa atropurpurea* L. aerial parts**

**growing on Northern Algeria**

Hadjer Sekhri Zeggar1, Ahlem Karbab1, Esraa A. Elhawary2, Noureddine Charef1, Lekhmici Arrar1, Salma Sameh2, Ahmed M. Elissawy2,3, Abdel Nasser B. Singab2,3*

1Laboratory of Applied Biochemistry, University, Setif-1, Ferhat Abbas 19000 Algeria.

2Department of Pharmacognosy, Faculty of Pharmacy, Ain-Shams University, Cairo

11566, Egypt.

3Center of Drug Discovery Research and Development, Ain Shams University, Cairo

11566, Egypt.

**Corresponding author:** Abdel Nasser B. Singab, Professor of Pharmacognosy, Department of Pharmacognosy, Faculty of Pharmacy, Ain-Shams University, Cairo, Egypt. E-mail: [abdelnassersingab@pharma.asu.edu.eg](mailto:abdelnassersingab@pharma.asu.edu.eg), [vpr.nassersingab@asu.edu.eg](mailto:vpr.nassersingab@asu.edu.eg).

**
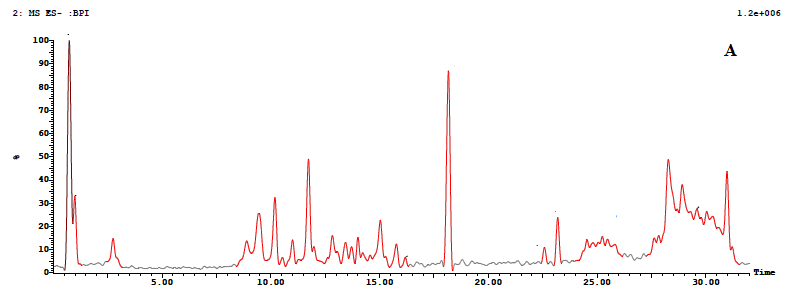
**

**
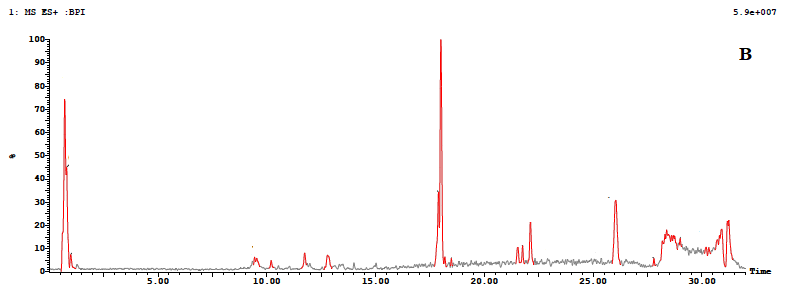
**

**Fig. S1. BPI chromatogram of UPLC/ESI/MS profile of the aqueous extract in the negative (A) and positive (B) modes.**


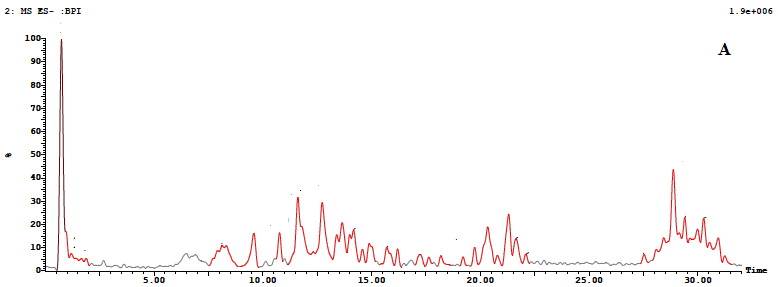


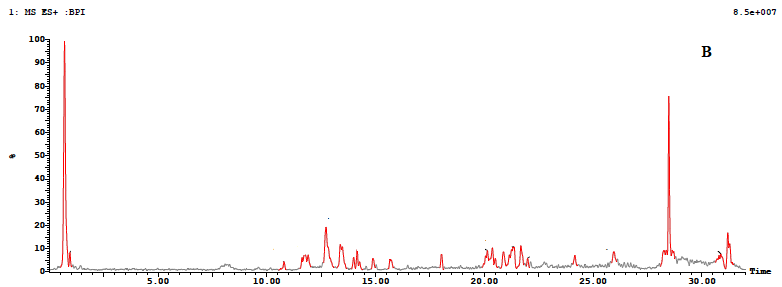


**Fig. S2. BPI chromatogram of UPLC/ESI/MS profile of the methanol extract in the negative (A) and positive (B) modes.**

**Fig. S3.** Hydroxyl radical scavenging effect of aqueous extract (AqE) and methanol extract (ME) from *S. atropurpurea* L. Outcomes are given as mean ± SD (n=3). **p<0.01, ***p<0.001.

**Fig. S4.** Hydrogen peroxide scavenging effect of aqueous extract (AqE) and methanol extract (ME) from *S. atropurpurea* L. Results are shown as mean ± SD (n=3). *p<0.05, **p<0.01.

**Fig. S5.** Analgesic impact of *S. atropurpurea*, at different concentrations. Values are represented as mean ± SEM (n = 5). ns: no significant difference, **P<0.01, ***P<0.001. AqE: aqueous extract, ME: methanol extract.

**Table S1.** Total phenolic, flavonoids and condensed tannins content of *S. atropurpurea* extracts.

| **Extracts** | **TPC (µg GAE/mg DE) a** | **TFC (µg QE/mg DE) b** | **CTC (µg CE/mg DE) c** |
| --- | --- | --- | --- |
| **AqE** | 81.6 ± 1.6 | 45.33 ± 0.36 | 41.04 ± 0.64 |
| **ME** | 114.13 ± 0.92 | 100.57 ± 0.93 | 26.22 ± 1.11 |

Data are shown as mean ±SD (n=3). a Gallic acid equivalent/mg of dried extract, b Quercetin equivalent/mg of dried extract, c Catechin equivalent/mg of dried extract.

**Table S2.** **Tentatively identified secondary metabolites from the methanol extract of *Scabiosa atropurpurea* aerial parts**

| **No.** | **Compound name** | **Chemical**  **Class** | **Molecular Formula** | **Rt**  **(min.)** | **[M-H]-**  ***m/z*** | **[M+H] +**  ***m/z*** | **% Composition** | **MS/MS fragments** | **Ref.** |
| --- | --- | --- | --- | --- | --- | --- | --- | --- | --- |
| **ME.** |
| 1 | Catechin hexoside | Flavonoid | C21H24O11 | 1.60 | 451 | - | 1.06 | 405, 375, 353, 339, 305, 247, 181 | 1,2 |
| 2 | Catechin hexoside isomer | Flavonoid | C21H24O11 | 5.96 | 451 | - | 0.21 | 405, 389, 353, 325, 243, 191 | 1,2 |
| 3 | **Caffeoyl quinic acid dimer** | Cinnamic acid deriv. | C32H36O18 | 7.94 | 707 | 732 | **8.54**  **(5.62)** | 353, 191 | 3 |
| 4 | **Eustomoside*** | Secoiridoid | C16H22O11 | 9.40 | 389 | 401 | **5.76** | 353, 233, 225, 179 | 4 |
| 5 | Fragment of ursolic acid* | Triterpenoid | ----- | 10.33 | 363 | - | 2.35 | 393, 336, 308, 191, 179 | 5 |
| 6 | Phloridzin | Dihydrochalcone | C21H24O10 | 10.57 | 435 | 447 | 1.19  (1.12) | 403, 381, 377, 353, 335, 281, 246, 195 | 1,4,6 |
| 7 | Tetrahydroxy trimethoxy dihydroxyflavone | Flavonoid | C19H18O10 | 10.79 | 377 | - | 0.52 | 374, 336, 305, 275, 199, 179 | 1,7 |
| 8 | **Ursolic acid derivative*** | Triterpenoid | ----- | 12.64 | 547 | - | **4.50** | 447, 411, 393, 300, 291, 253, 241, 149 | 1,8 |
| 9 | *di*-Caffeoyl quinic acid* | Cinnamic acid deriv. | C25H24O12 | 13.19 | 515 | - | 2.21 | 447, 431, 353, 337, 265, 231, 201, 169 | 9,10 |
| 10 | ***di*-Caffeoylquinic acid isomer*** | Cinnamic acid deriv. | C25H24O12 | 13.56 | 515 | - | **7.18** | 489, 447, 353, 301, 265, 193, 187, 179, 161 | 9,10 |
| 11 | **Unknown saponin** | Saponin | ----- | 13.88 | 789 | 808 | **4.45**  (1.93) | 706, 653, 631, 584, 525, 461, 372, 331, 265, 225, 199, 181, 161 | - |
| 12 | Caffeoyl-succinyl-[(hydroxyphenyl)-acetyl)]-methyl quinate | Phenolic acid | ----- | 14.79 | 629 | - | 1.52 | 587, 520, 458, 421, 373, 285, 201, 187, 179, 161 | 1,11 |
| 13 | Diosmetin-hexoside* | Flavonoid | C22H22O11 | 16.05 | 461 | - | 0.30 | 440, 433, 389, 330, 285, 253, 212, 191, 179 | 10 |
| 14 | *tri-*Galloyl-hexose | Tannin | C27H24O18 | 16.66 | 635 | 637 | 0.45 | 537, 465, 419, 368, 341, 309, 280, 269, 181 | 1,12 |
| 15 | Glycosilated dimeric proanthocyanidin | Tannin | ----- | 17.12 | 739 | - | 2.50 | 538, 467, 426, 393, 313, 289, 213, 183, 163 | 13 |
| 16 | Hypolaetin-allosyl-[acetyl]-hexoside | Flavonoid | ----- | 17.59 | 667 | - | 0.55 | 537, 489, 375, 344, 309, 285, 185, 179 | 1,14 |
| 17 | Cirsimaritin* | Dimethoxyflavone | C17H14O6 | 19.05 | 313 | - | 0.44 | 297, 249, 229, 177, 175 | 1,15 |
| 18 | Hederagenin* | Saponin | C30H48O4 | 19.99 | 471 | 476 | 0.42 | 457, 434, 325, 293, 249, 190 | 16 |
| 19 | Apigenin-rutinoside | Flavonoid | C27H30O14 | 20.70 | 577 | - | 0.06 | 564, 476, 448, 339, 295, 291, 217, 191, 181 | 1,15 |
| 20 | ***alpha*-Artemisic acid** | Sesquiterpenoid | C18H32O3 | 21.19 | 295 | 298 | **6.36** | 246, 223, 205, 199, 177, 167, 127 | 17 |
| 21 | Caffeoyl-2-hydroxyethane-1,1,2-tricarboxylic acid | Cinnamic acid deriv. | C14H12O10 | 27.39 | 339 | - | 0.41 | 326, 299, 265, 186, 174 | 17-19 |
| 22 | **Caffeic acid-hexouronide** | Cinnamic acid deriv. | C15H16O10 | 28.78 | 355 | - | **7.21** | 339, 311, 300, 221, 197, 161, 145 | 17,20 |

Compounds in bold are the major components. Rt; retention time, Ref.; reference(s).

* For compounds previously identified from genus *Scabiosa.*

**Table S3.** **Tentatively identified secondary metabolites from the aqueous extract of *Scabiosa atropurpurea* aerial parts**

Compounds in bold are the major components. Rt; retention time, Ref.; reference(s).

* For compounds previously identified from genus *Scabiosa.*

| **No.** | **Compound name** | **Chemical**  **Class** | **Molecular Formula** | **Rt**  **(min.)** | **[M-H]-**  ***m/z*** | **[M+H] +**  ***m/z*** | **% Composition** | **MS/MS fragments** | **Ref.** |
| --- | --- | --- | --- | --- | --- | --- | --- | --- | --- |
| **AqE.** |
| 1 | **Myricetin-(galloyl)-pentoside** | Flavonoid | C28H24O17 | 13.32 | 601 | - | **4.48** | 525, 483, 447, 431, 379, 265, 225, 189, 179 | 1,7,21 |
| 2 | **Protocatechuic acid-hexoside*** | Cinnamic acid deriv. | C13H16O9 | 17.17 | 315 | - | **4.52** | 293, 271, 219, 212, 179, 153 | 22 |
| 3 | **Feruloyl-caffeoyl-quinic acid derivative** | Cinnamic acid deriv. | ----- | 22.30 | 265 | - | **32.81** | 243, 196, 154, 116 | 17,23 |
| 4 | **Feruloyl-caffeoyl-quinic acid derivative isomer** | Cinnamic acid deriv. | ----- | 22.57 | 265 | - | **4.71** | 249, 203, 194, 178, 156, 123, 117 | 17,23 |
| 5 | ***p*-Coumaric acid-hexoside*** | Cinnamic acid deriv. | C15H18O8 | 25.82 | 325 | - | **8.67** | 311, 293, 271, 265, 235, 145 | 24 |

**Table S4.** Inhibition percent of protein denaturation by aqueous extract (AqE) and methanol extract (ME) from *S. atropurpurea* Lat different doses. Data are given as mean ± SD (n=3).

| [C] mg/mL | % Inhibition | |  |
| --- | --- | --- | --- |
|  | **AqE** | **ME** | |
| 0.5 mg/mL | 61.97 ± 1.35 | 33.60 ± 1.29 | |
| 0.25 mg/mL | 54.70 ± 0.34 | 25.66 ± 1.36 | |
| 0.125mg/mL | 37.85 ± 1.76 | 19.06 ± 1.50 | |

**Table S5.** Anti-inflammatory potential of *S. atropurpurea* on formalin-induced paw edema. Results are given as mean ± SEM (n=5). ns: no significant difference, *P<0.05, **P<0.01, ***P<0.001. AqE: aqueous extract, ME: methanol extract.

| Extracts/  Standard | [C] mg/kg |  | | Inhibition % | |  |  | |
| --- | --- | --- | --- | --- | --- | --- | --- | --- |
|  |  | 30 min | 1h | | 2h | | | 3h |
| AqE | 25 | 27.29 ± 1.42** | 29.44 ± 1.79*** | | 30.77 ± 0.84*** | | | 32.28 ± 2.37*** |
| 50 | 32.6 ± 2.7ns | 37.9 ± 3.12ns | | 46.15 ± 1.66** | | | 48.58 ± 2.46*** |
| 100 | 39.22 ± 2.85ns | 42.26 ± 4.57 ns | | 52 ± 2.89 ns | | | 57.91 ± 3.76** |
| ME | 25 | 34.64 ± 2.31 ns | 39.87 ± 0.8 ns | | 43.46 ± 1.11*** | | | 50.65 ± 3.07*** |
| 50 | 37.25 ± 2.29 ns | 40.2 ± 2.4 ns | | 52.94 ± 2.75 ns | | | 55.88 ± 2.37*** |
| 100 | 42.48 ± 1.74 ns | 43.79 ± 2.35 ns | | 54.9 ± 2.17 ns | | | 61.11 ± 1.58* |
| Diclofenac | 25 | 39.13±2.04 | 44.35±3.64 | | 60±2.79 | | | 70.25±3.52 |

**Table S6. Binding interactions of the major compounds with cyclooxygenase-2 (5F19)**

| **Compound name** | **Score Kcal/mol** | **Hydrophobic** | **Hydrogen bond** | **π-stacking** | **π-cation** | **Salt bridge** |
| --- | --- | --- | --- | --- | --- | --- |
| **Loganic acid** | -7.6 | VAL 447 | THR 206 | - | - | HIS 207 |
| HIS 207 | HIS 207 |
| ASN 382 | HIS 386 |
| ASN 382 | HIS 386 |
| GLN 454 | HIS 388 |
| HIS 388 |
| **Chlorogenic acid** | -9.5 | GLN 203 | ALA 199 | - | - | HIS 207 |
| GLN 203 | PHE 210 | HIS 207 |
| LEU 391 | THR 212 | HIS 214 |
| HIS 214 | HIS 386 |
| ASN 382 | HIS 388 |
| HIS 386 |
| HIS 386 |
| **Luteolin hexoside** | -9.7 | GLN 203 | ALA 199 | HIS 207 | HIS 388 | HIS 207 |
| GLN 203 | HIS 214 | HIS 207 | HIS 214 |
| LEU 391 | ASN 382 |
| **Caffeoyl quinic acid dimer** | -9.4 | GLN 203 | ALA 199 | - | - | HIS 207 |
| PHE 210 | ALA 202 |
| PHE 210 | GLN 203 | HIS 386 |
| VAL 291 | GLN 203 | HIS 388 |
| LEU 294 | HIS 214 | HIS 388 |
| TRP 387 | TRP 387 |
| ILE 408 | HIS 388 |
| VAL 447 |
| **Eustomoside** | -8.1 | - | THR 206 | - | - | HIS 207 |
| TYR 385 | HIS 207 |
| TYR 385 | HIS 214 |
| TRP 387 | HIS 386 |
| HIS 388 | HIS 386 |
| GLN 454 | HIS 388 |
| HIS 388 |
| **Apigenin-hexoside** | -9.9 | VAL 295 | HIS 207 | HIS 207 | - | HIS 207 |
| LEU 391 | ASN 382 | HIS 386 |
| LEU 391 | ASN 382 | HIS 388 |
| TYR 385 |
| HIS 386 |
| TRP 387 |
| **Derivative of syringaldehyde** | -7.2 | GLN 203 | HIS 207 | - | HIS 207 | - |
| GLN 203 | TYR 385 |
| HIS 388 |

**Table S6. Binding interactions of the major compounds with cyclooxygenase-2 (5F19) (Cont.)**

| **Compound name** | **Score**  **Kcal/mol** | **Hydrophobic** | **Hydrogen bond** | **π-stacking** | **π-cation** | **Salt bridge** |
| --- | --- | --- | --- | --- | --- | --- |
| **Ursolic acid** | -8.5 | LEU 145 | ARG 376 | - | - | - |
| ASP 229 | ARG 376 |
| ILE 337 |
| VAL 538 |
| VAL 538 |
| **di-caffeoylquinic acid** | -10.1 | HIS 388 | GLN 203 | HIS 388 | - | HIS 207 |
| LEU 391 | HIS 207 | HIS 386 |
| VAL 444 | PHE 210 | HIS 386 |
| THR 212 | HIS 388 |
| HIS 214 | HIS 388 |
| ASN 382 |
| **Protocatechuic acid-hexoside** | -8.2 | GLN 203 | ALA 199 | HIS 388 | - | HIS 207 |
| HIS 207 | HIS 386 |
| HIS 214 | HIS 388 |
| ASN 382 |
| ASN 382 |
| TYR 385 |
| HIS 386 |
| **Caftaric acid** | -8.6 | ALA 202 | GLN 203 | - | - | HIS 207 |
| GLN 203 | PHE 210 | HIS 207 |
| THR 212 | HIS 214 |
| ASN 382 | HIS 386 |
| HIS 386 |
| HIS 386 |
| HIS 388 |
| **Hydroxy-octadecatrienoic acid** | -6.9 | ALA 202 | HIS 207 | - | - | HIS 214 |
| TYR 385 | HIS 388 | HIS 386 |
| TRP 387 | HIS 388 |
| LEU 390 | GLN 454 |
| LEU 391 | GLN 454 |
| ***p*-coumaric acid-hexoside** | -9.2 | PHE 210 | GLN 203 | HIS 386 | HIS 207 | HIS 207 |
| PHE 210 | THR 212 | HIS 214 |
| THR 212 | HIS 388 |
| ASN 382 |
| TRP 387 |
| HIS 388 |
| **Caffeic acid-hexouronide** | -8.9 | PHE 210 | GLN 203 | HIS 386 | HIS 207 | HIS 214 |
| PHE 210 | THR 206 | HIS 388 |
| HIS 207 | HIS 388 |

**Table S6. Binding interactions of the major compounds with cyclooxygenase-2 (5F19) (Cont.)**

| **Compound name** | **Score**  **Kcal/mol** | **Hydrophobic** | **Hydrogen bond** | **π-stacking** | **π-cation** | **Salt bridge** |
| --- | --- | --- | --- | --- | --- | --- |
| **Caffeic acid-hexouronide (Cont.)** | **-** | **-** | THR 212 | **-** | **-** | **-** |
| THR 212 |
| ASN 382 |
| TYR 385 |
| TRP 387 |
| TRP 387 |
| **Diclofenac (Standard)** | -7.9 | ALA 202 | ASN 382 | HIS 207 | HIS 388 | HIS 207 |
| GLN 203 | HIS 388 | HIS 386 |
| LEU 390 |

**References**

1 Nilofar *et al.* Exploring the chemical composition and biological effects of four Salvia hybrids: an innovative perspective on functional yields. *eFood* **5**, e70012 (2024).

2 Kang, J., Price, W. E., Ashton, J., Tapsell, L. C. & Johnson, S. Identification and characterization of phenolic compounds in hydromethanolic extracts of sorghum wholegrains by LC-ESI-MSn. *Food chemistry* **211**, 215-226 (2016).

3 Morsi, E. A., Abdel-Hameed, E.-S., El-Sayed, M. M. & Rabia, I. A. HPLC-ESI-MS characterization of certain compounds of methanolic extract of Nerium oleander and its fractions as well as evaluation of their potential against Schistosomiasis mansoni. *Egyptian Journal of Chemistry* **65**, 133-143 (2022).

4 Kılınc, H. *et al.* Scabiosa atropurpurea: A rich source of iridoids with α-glucosidase inhibitory activity evaluated by in vitro and in silico studies. *Phytochemistry* **205**, 113471 (2023).

5 Mostafa, S. F., Abdou, R. M., El-Tanbouly, N. D. & El-sayed, A. M. Metabolites Proﬁling of Pouteria Campechiana (Kunth) Baehni Different Organs Using UPLC-PDA-MS and its Biological Activities. *Egyptian Journal of Chemistry* **66**, 167-176 (2023).

6 Hossain, M. B., Rai, D. K., Brunton, N. P., Martin-Diana, A. B. & Barry-Ryan, C. Characterization of phenolic composition in Lamiaceae spices by LC-ESI-MS/MS. *Journal of agricultural and food chemistry* **58**, 10576-10581 (2010).

7 Elhawary, E., Mostafa, N., Shehata, A. & Labib, R. Comparative study of selected Rosa varieties’ metabolites through UPLC-ESI-MS/MS, chemometrics and investigation of their insecticidal activity against Culex pipiens L. *Jordan Journal of Pharmaceutical Sciences* **14** (2021).

8 Abdelaziz, S. *et al.* Ultra performance liquid chromatography-tandem mass spectrometeric analysis of ethyl acetate fraction from saudi Lavandula coronopifolia Poir and evaluation of its cytotoxic and antioxidant activities. *Journal of Herbmed Pharmacology* **9**, 268-276 (2020).

9 Kılınç, H. Isolation and characterization of secondary metabolites from apolar fraction of Scabiosa sicula and evaluation of their antioxidant activities. *Gümüşhane Üniversitesi Fen Bilimleri Dergisi* **11**, 934-942 (2021).

10 Ben Toumia, I. *et al.* A methanol extract of Scabiosa atropurpurea enhances doxorubicin cytotoxicity against resistant colorectal Cancer cells in vitro. *Molecules* **25**, 5265 (2020).

11 Brito, A., Ramirez, J. E., Areche, C., Sepulveda, B. & Simirgiotis, M. J. HPLC-UV-MS profiles of phenolic compounds and antioxidant activity of fruits from three citrus species consumed in Northern Chile. *Molecules* **19**, 17400-17421, doi:10.3390/molecules191117400 (2014).

12 Mekam, P. N., Martini, S., Nguefack, J., Tagliazucchi, D. & Stefani, E. Phenolic compounds profile of water and ethanol extracts of Euphorbia hirta L. leaves showing antioxidant and antifungal properties. *South African Journal of Botany* **127**, 319-332 (2019).

13 Maldini, M., Montoro, P., Piacente, S. & Pizza, C. ESI-MS, ESI-MS/MS fingerprint and LC-ESI-MS analysis of proathocyanidins from Bursera simaruba Sarg bark. *Natural Product Communications* **4**, 1934578X0900401212 (2009).

14 Petreska, J. *et al.* Phenolic compounds of mountain tea from the Balkans: LC/DAD/ESI/MSn profile and content. *Natural product communications* **6**, 1934578X1100600107 (2011).

15 Gkioni, M. D., Zeliou, K., Dimaki, V. D., Trigas, P. & Lamari, F. N. GC-MS and LC-DAD-MS Phytochemical Profiling for Characterization of Three Native Salvia Taxa from Eastern Mediterranean with Antiglycation Properties. *Molecules* **28**, 93 (2022).

16 Skała, E. & Szopa, A. Dipsacus and Scabiosa Species—The Source of Specialized Metabolites with High Biological Relevance: A Review. *Molecules* **28**, 3754 (2023).

17 Yagi, S. *et al.* Functional constituents of Colchicum lingulatum Boiss. & Spruner subsp. rigescens K. Perss. extracts and their biological activities with different perspectives. *Food Bioscience*, 104496 (2024).

18 Ben Said, R. *et al.* Tentative characterization of polyphenolic compounds in the male flowers of Phoenix dactylifera by liquid chromatography coupled with mass spectrometry and DFT. *International journal of molecular sciences* **18**, 512 (2017).

19 Ye, M., Guo, D., Ye, G. & Huang, C. Analysis of homoisoflavonoids in Ophiopogon japonicus by HPLC-DAD-ESI-MS. *Journal of the American Society for Mass Spectrometry* **16**, 234-243 (2005).

20 Zhong, B. *et al.* LC-ESI-QTOF-MS/MS characterization of seaweed phenolics and their antioxidant potential. *Marine drugs* **18**, 331 (2020).

21 Saldanha, L. L., Vilegas, W. & Dokkedal, A. L. Characterization of flavonoids and phenolic acids in Myrcia bella cambess. Using FIA-ESI-IT-MSn and HPLC-PAD-ESI-IT-MS combined with NMR. *Molecules* **18**, 8402-8416 (2013).

22 Akar, Z. Chemical compositions by using LC–MS/MS and GC–MS and antioxidant activities of methanolic extracts from leaf and flower parts of Scabiosa columbaria subsp. columbaria var. columbaria L. *Saudi journal of biological sciences* **28**, 6639-6644 (2021).

23 Simirgiotis, M. J., Benites, J., Areche, C. & Sepulveda, B. Antioxidant Capacities and Analysis of Phenolic Compounds in Three Endemic Nolana Species by HPLC-PDA-ESI-MS. *Molecules* **20**, 11490-11507, doi:10.3390/molecules200611490 (2015).

24 Corradi, E., De Mieri, M., Gafner, F., Hamburger, M. & Potterat, O. A new secoiridoid glucoside, and a metabolite profile of Scabiosa lucida. *Natural Product Communications* **11**, 1934578X1601100705 (2016).
